# Supplementary material
Source: Springer Nature journal article supplement (https://www.springermedizin.de/resource/supplementary/12888_2010_871_MOESM1_ESM.pdf/9478378)

Length of stay (LOS), days

200  
150  
100  
50  
0

< / = 3 (Median) (1)

> 3 (Median) (2)

Apathy

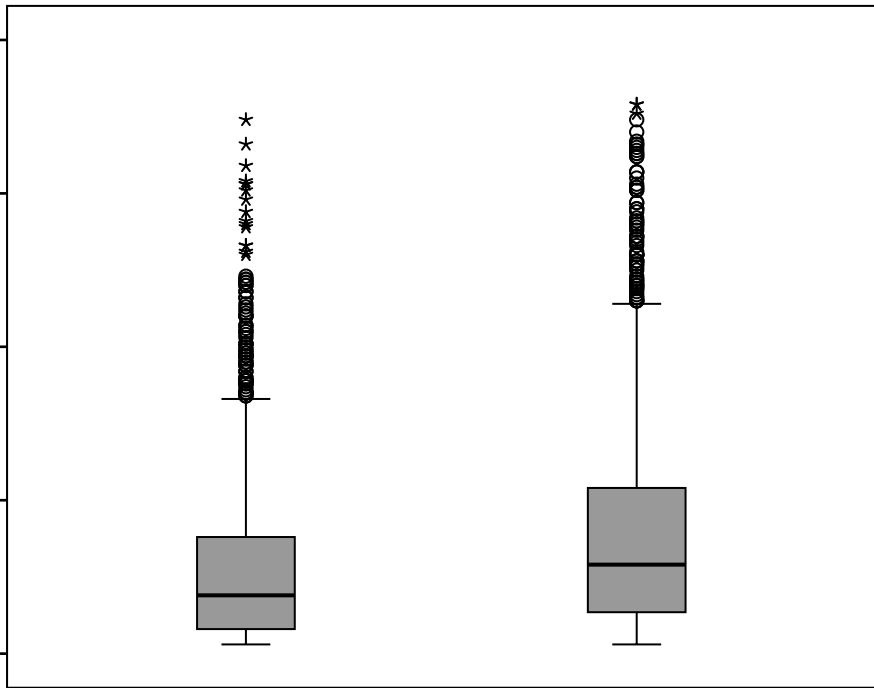

Supplement: MOESM1 [file 9478378]
